# Supplementary material
Source: PubMed Central journal article supplement (PMC4575890)
Supplement: NIHMS712915-supplement.pdf [file NIHMS712915-supplement.pdf]

**A**

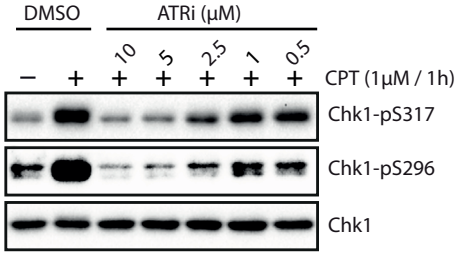

**B**

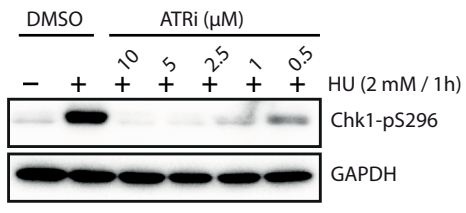

**C**

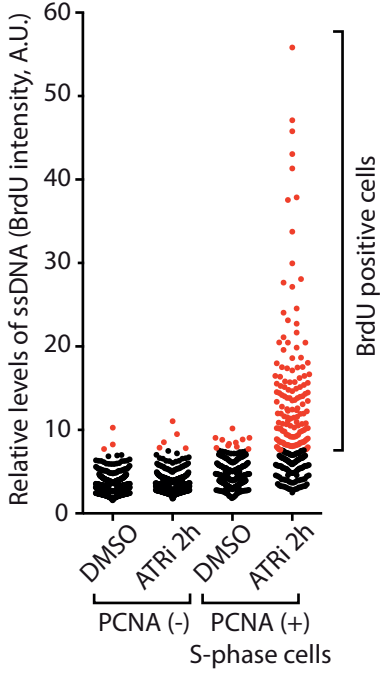

**D**

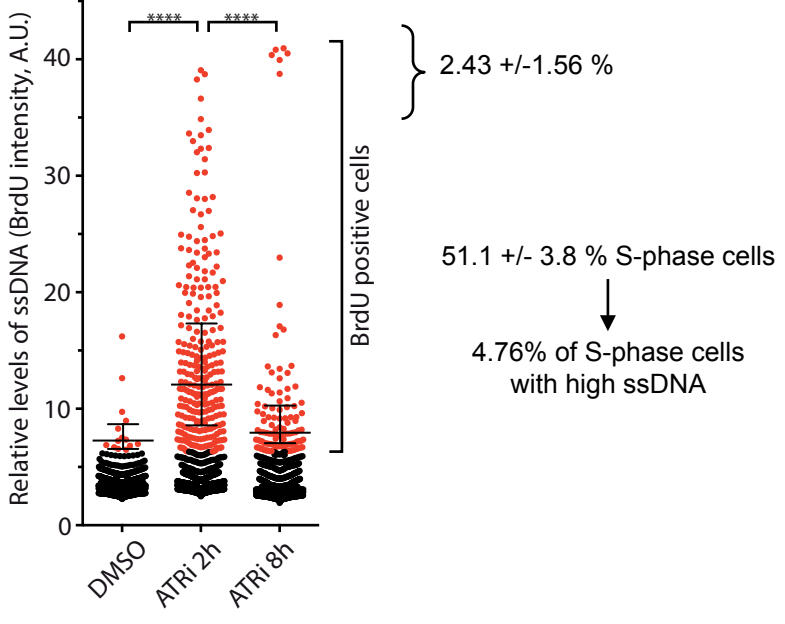

Fig. S1

E

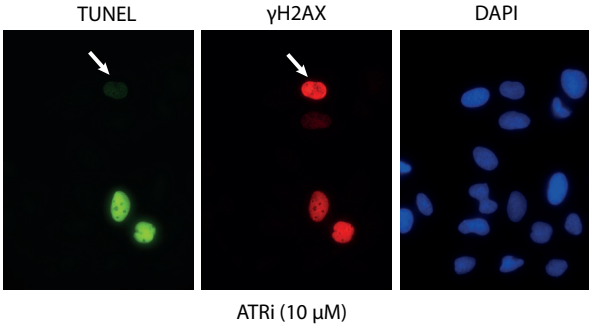

F

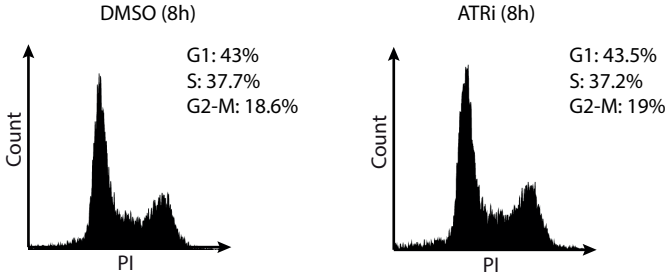

G

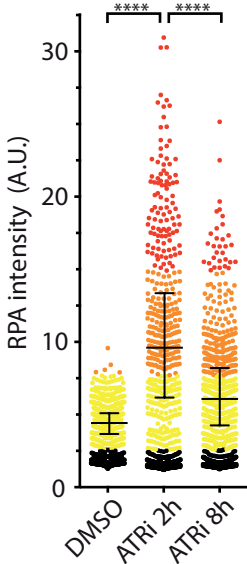

H

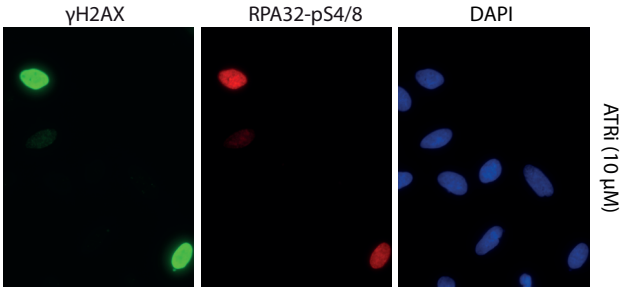



Fig. S3

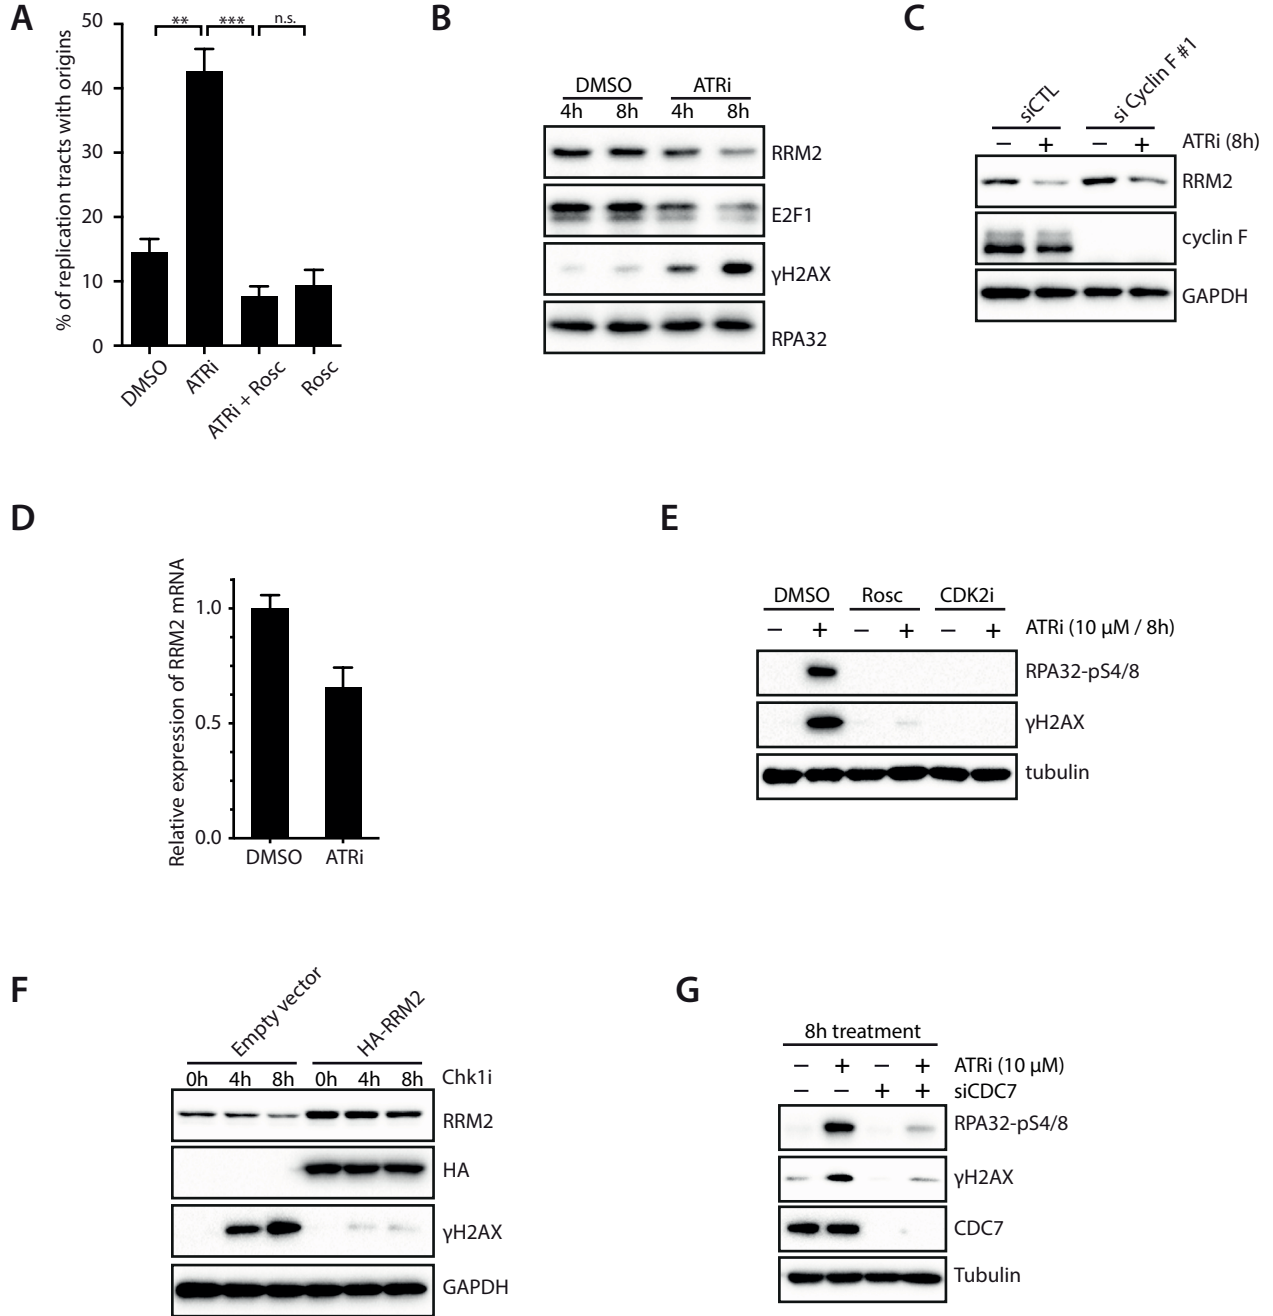

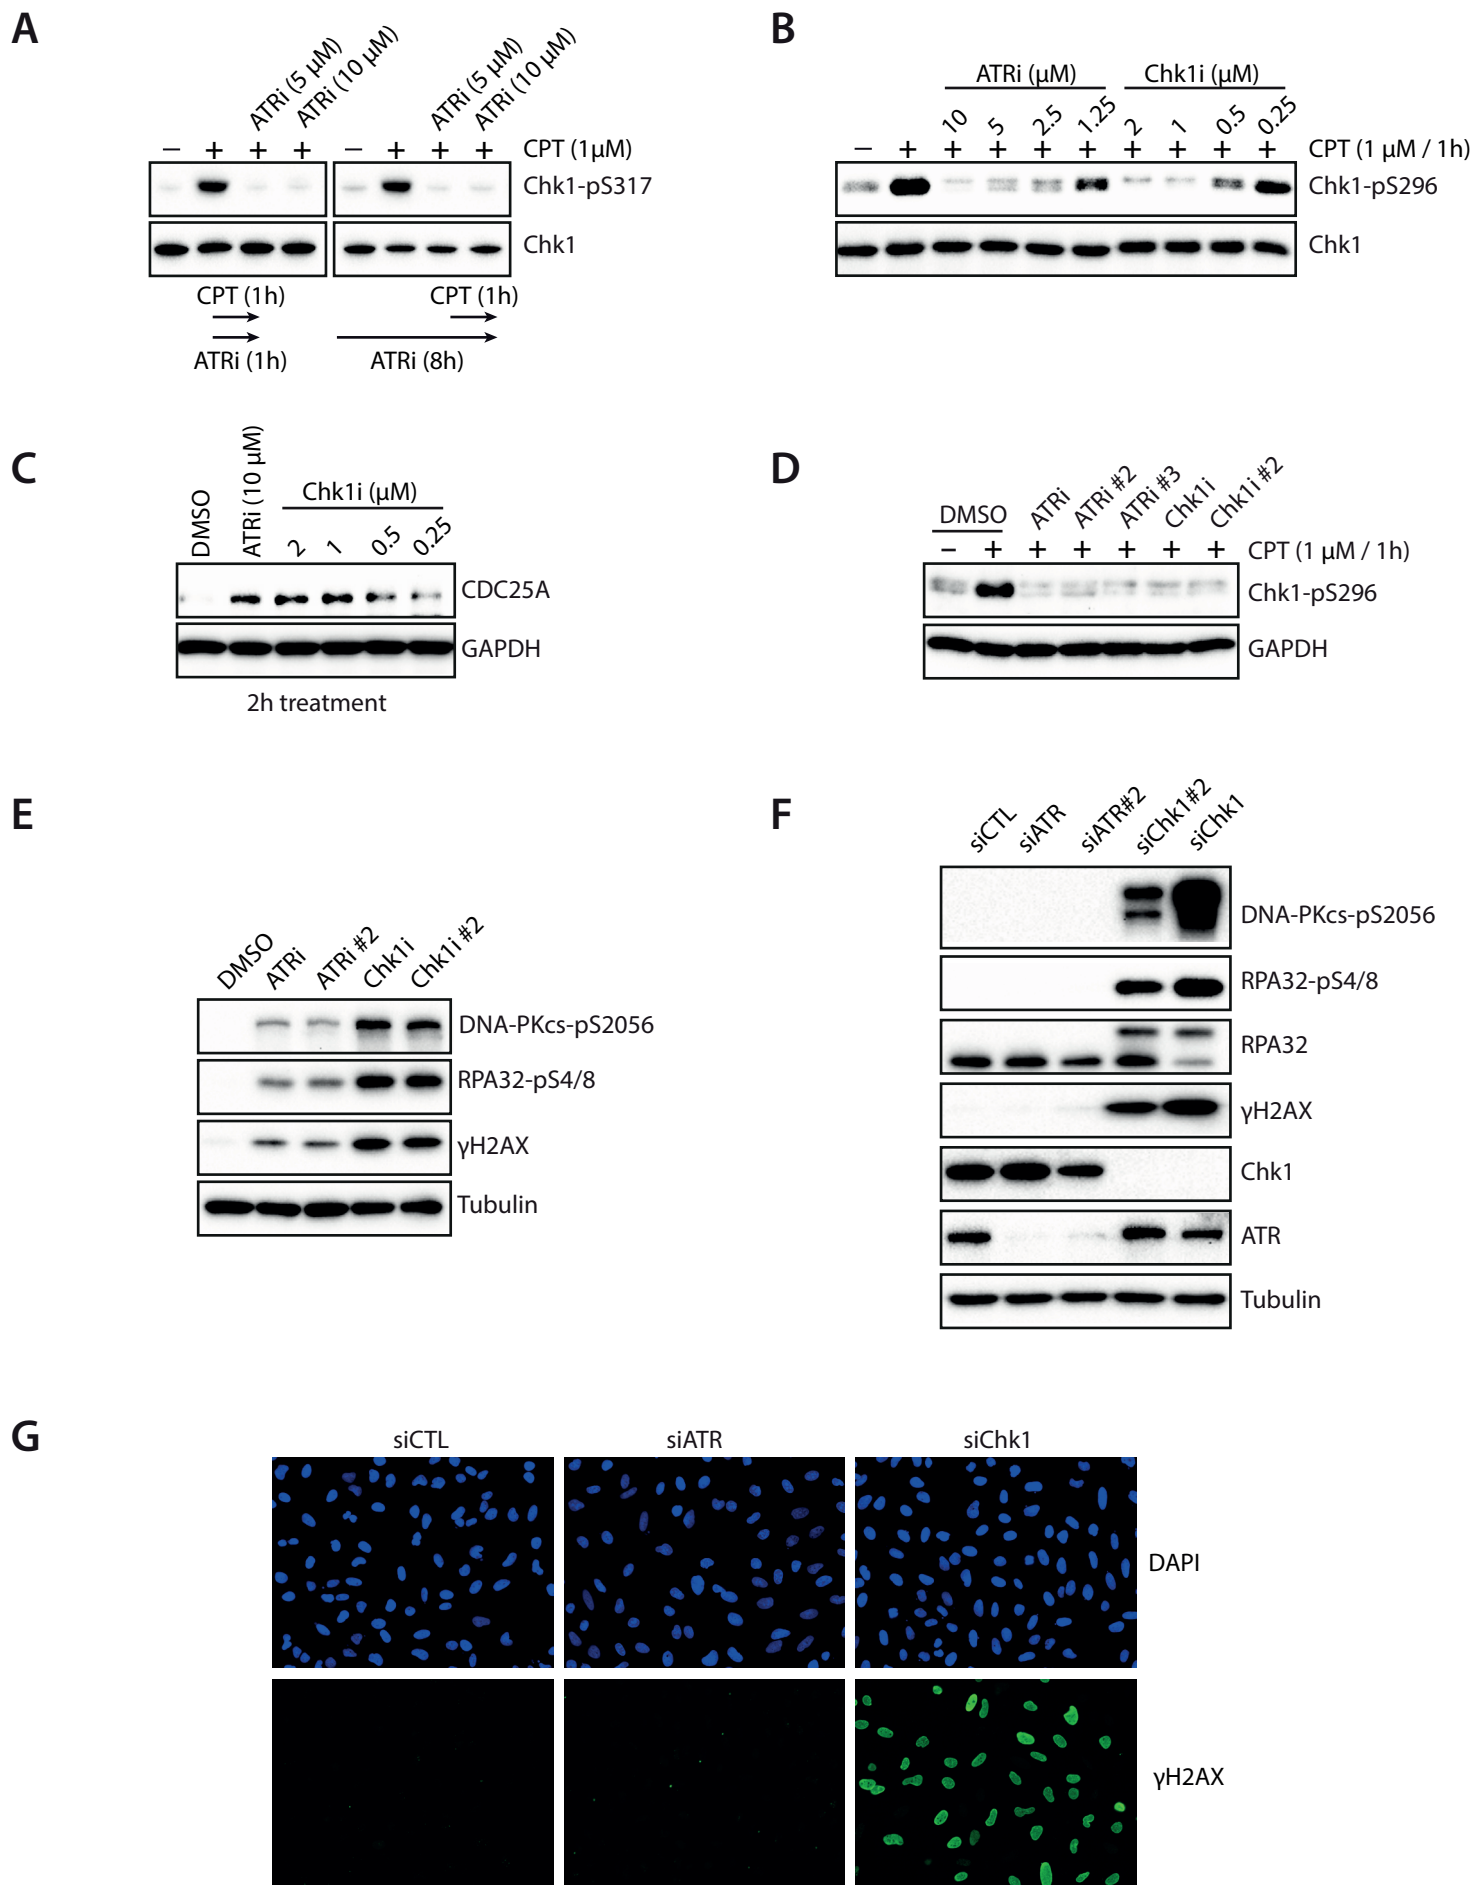

H

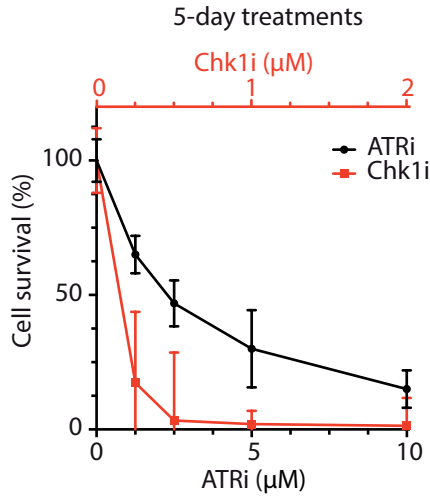

I

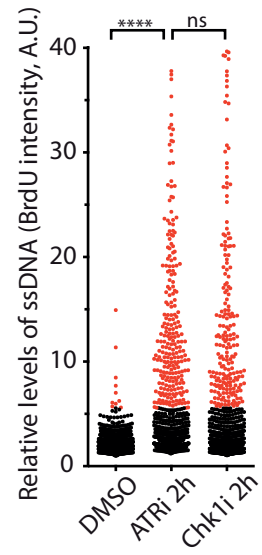

J

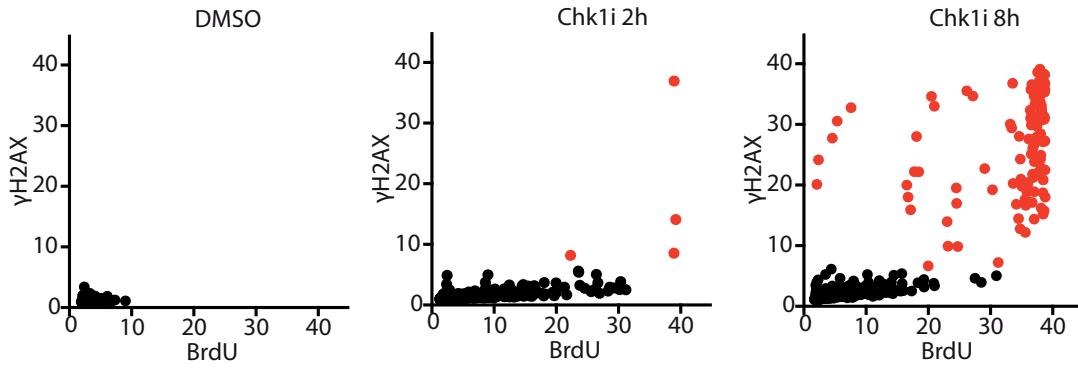

K

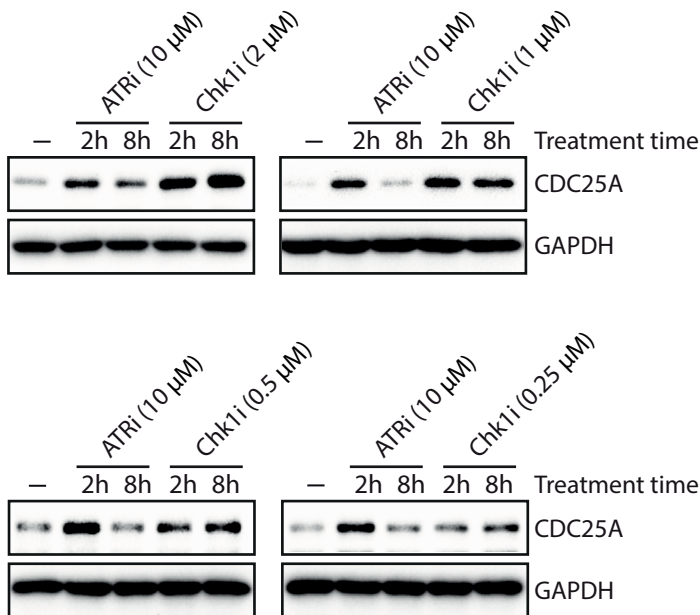

L

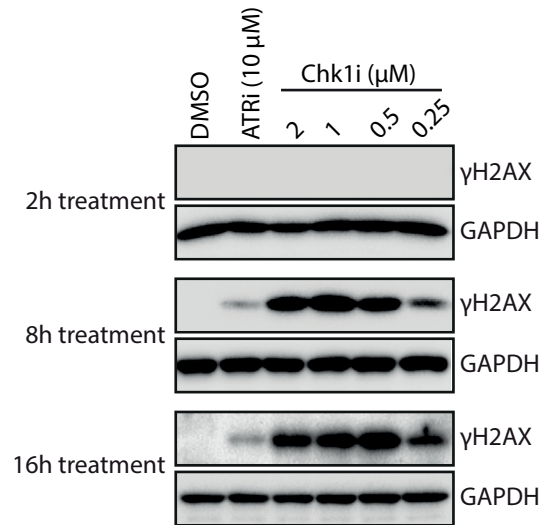

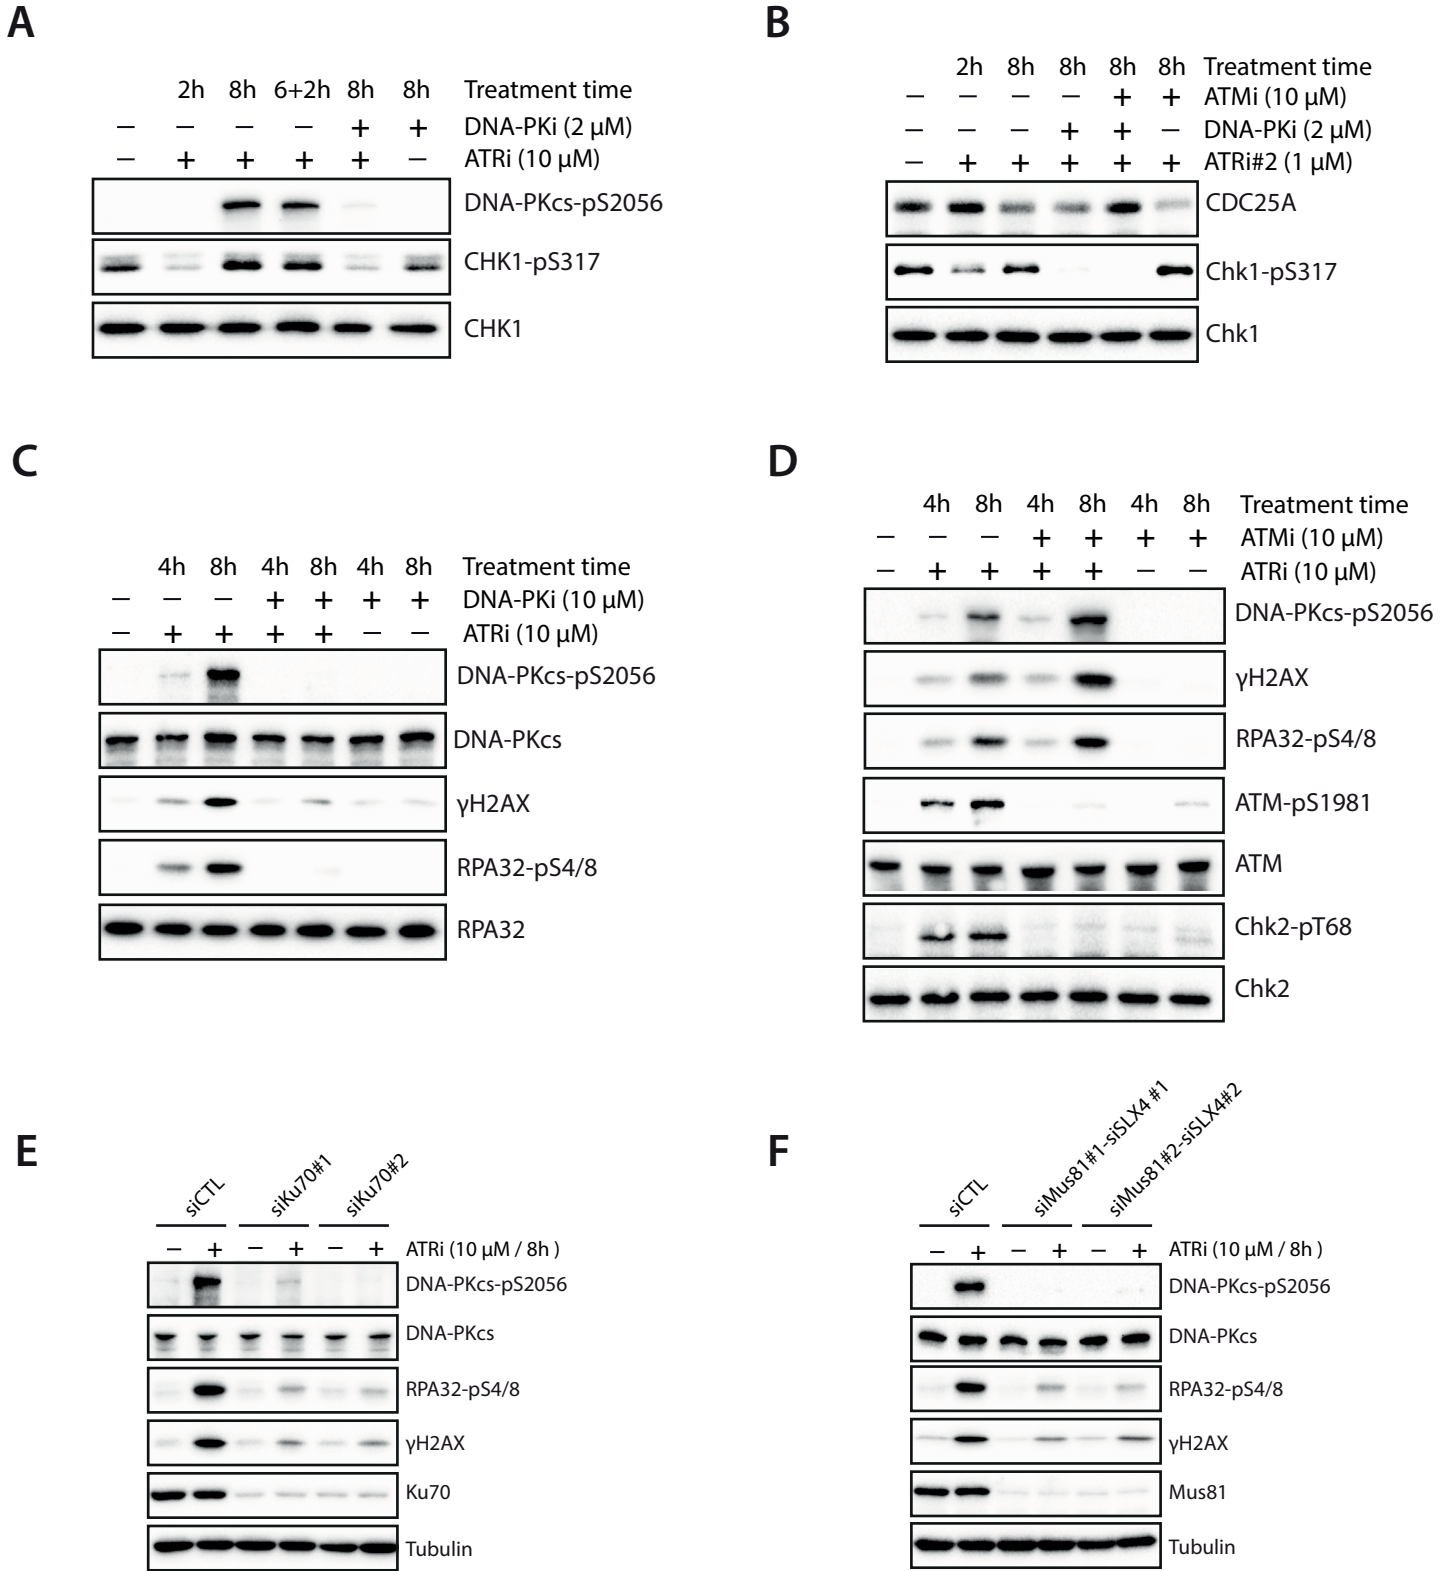

G

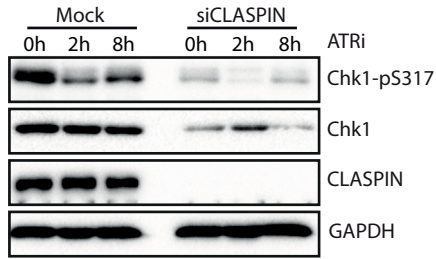

H

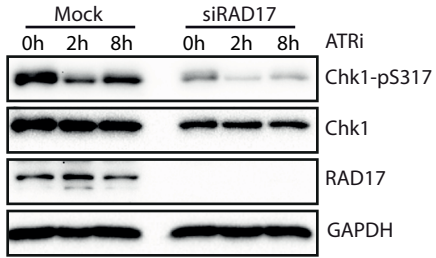

I

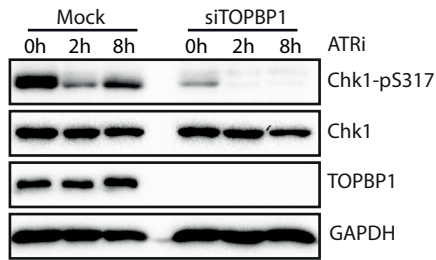

J

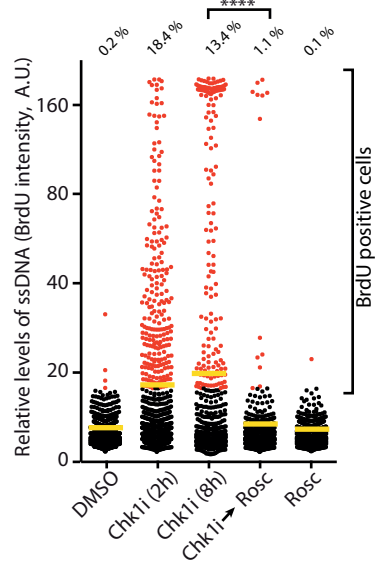

K

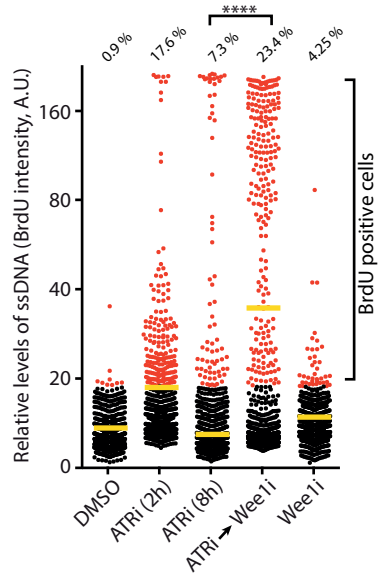



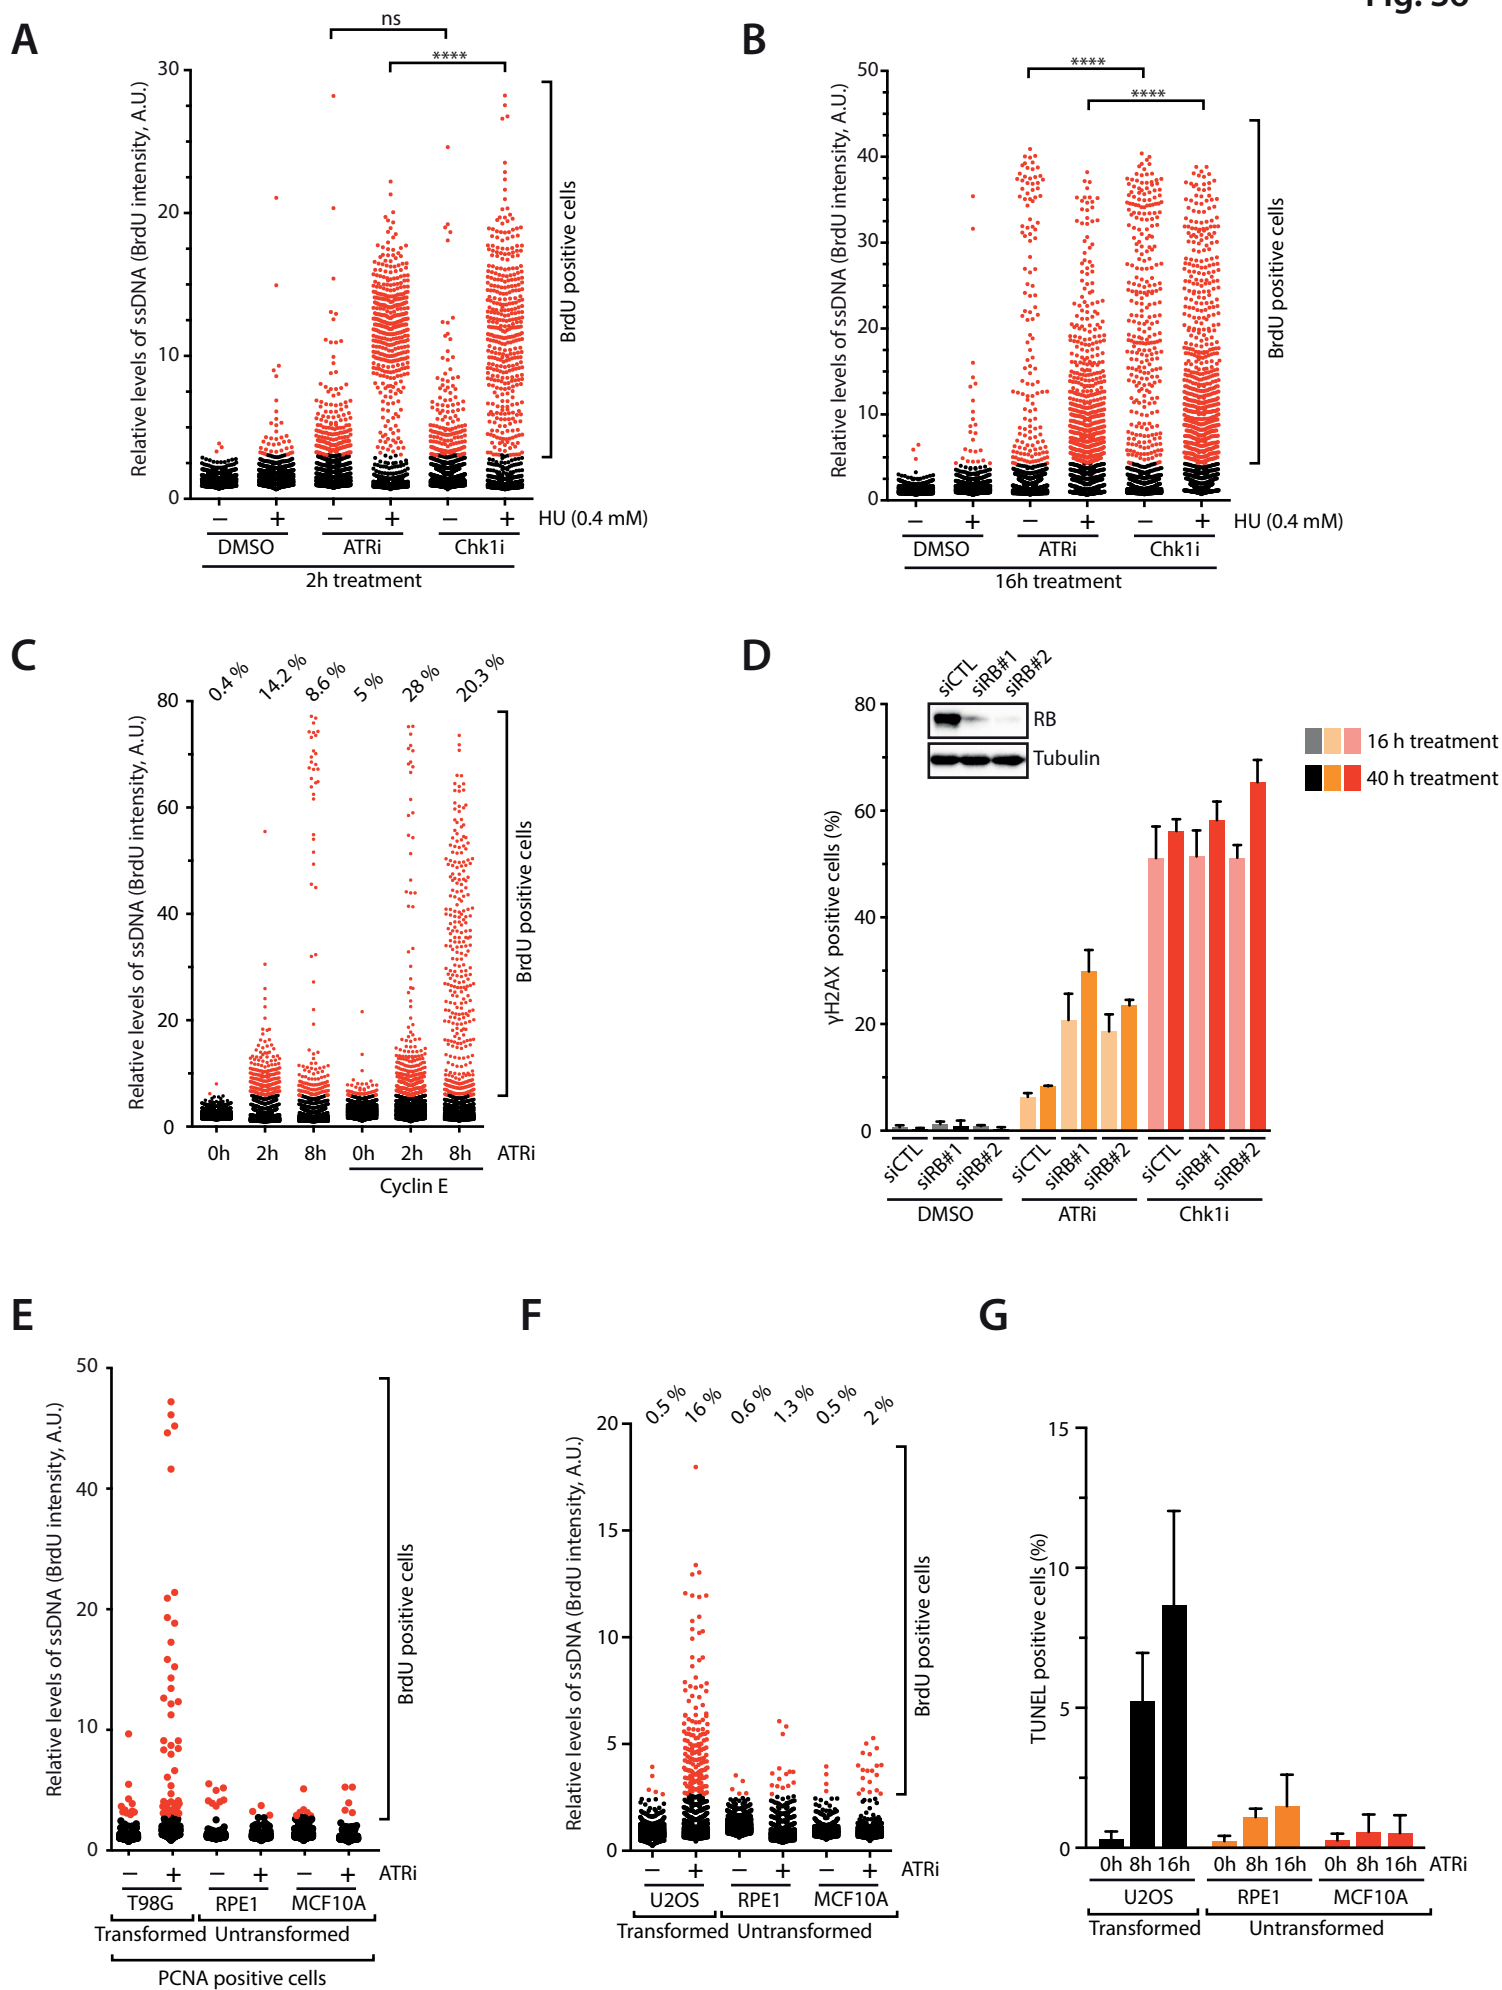

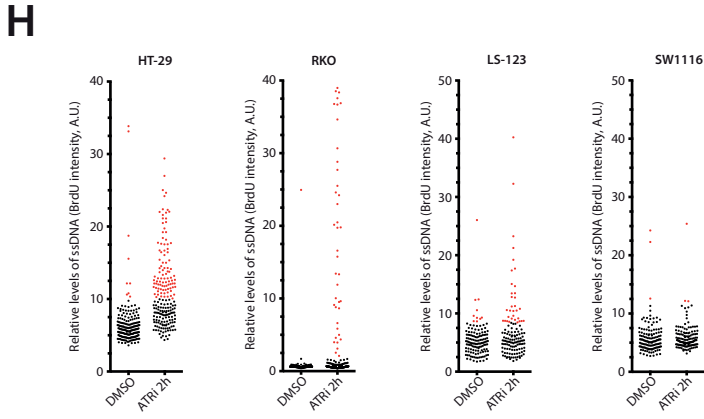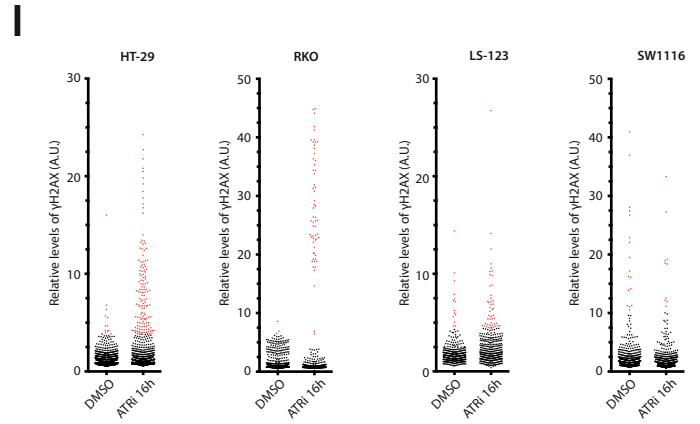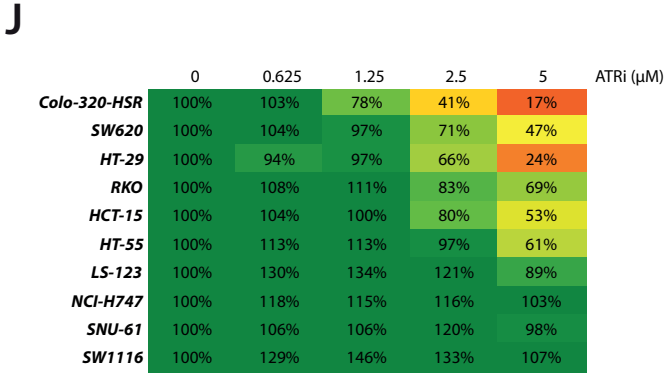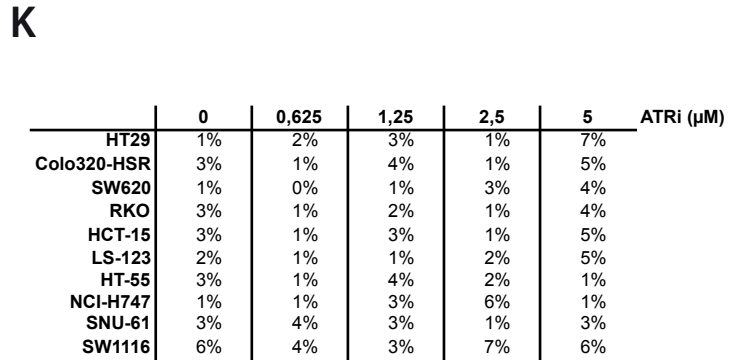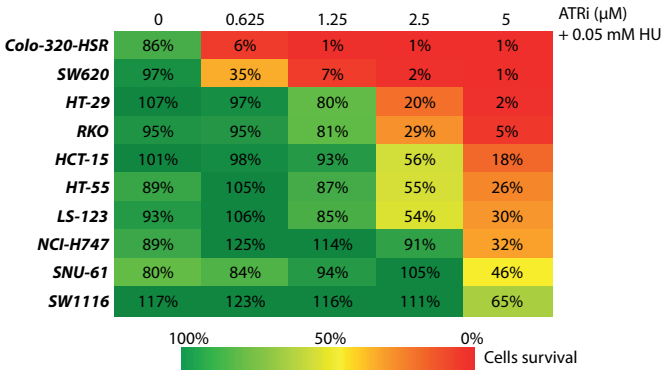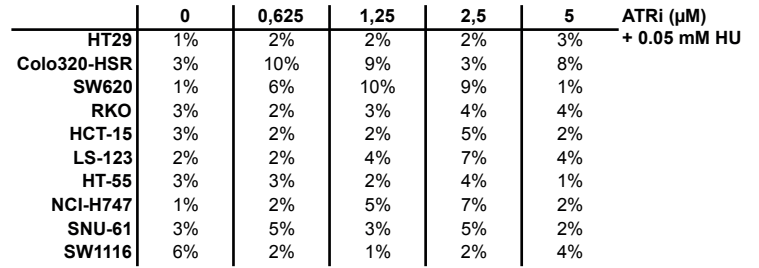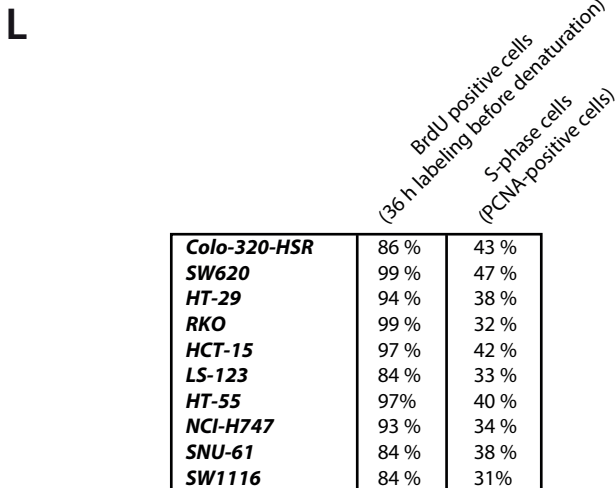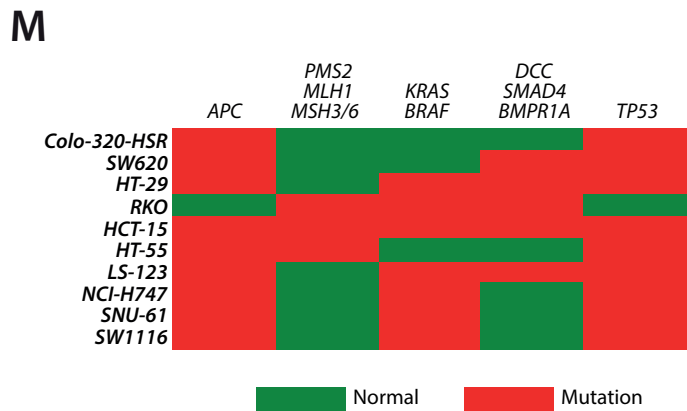

**N**

| Cell line           | MSI | CIMP | CIN |
|---------------------|-----|------|-----|
| <i>Colo-320-HSR</i> | MSS | -    | +   |
| <i>SW620</i>        | MSS | -/+  | +   |
| <i>HT-29</i>        | MSS | +    | +   |
| <i>RKO</i>          | MSI | +    | -   |
| <i>HCT-15</i>       | MSI | +    | -   |
| <i>SW1116</i>       | MSS | +    | +   |

## Supplemental Figures Legends

**Fig. S1, related to Fig. 1. The effects of ATRi on cycling cells. A-B.** U2OS cells were treated with CPT or HU in the presence of increasing concentrations of ATRi (VE-821). The phosphorylation of Chk1 at S296 and S317 was used as readout of ATR inhibition. **C.** U2OS cells were cultured in BrdU for 36 h, treated with DMSO or ATRi (10  $\mu$ M VE-821) for 2 h, and analyzed by native BrdU staining and PCNA immunostaining. BrdU intensity was quantified in PCNA-positive and -negative cells. **D.** U2OS cells were treated with DMSO or ATRi and analyzed by native BrdU staining (same data shown in Fig. 1B). Medium BrdU intensities of BrdU-positive cells in various cell populations were determined. Error bars: interquartile range (I.Q.R), n=19 to 277 in various cell populations. The fractions of ATRi-treated cells displaying high levels of ssDNA at 8 h were quantified from 3 experiments (n=3). The fractions of S-phase cells were determined by EdU labeling or PCNA immunostaining. **E.** U2OS cells were treated with ATRi for 8 h, and analyzed by TUNEL assay and  $\gamma$ H2AX immunostaining. Note that a small fraction of  $\gamma$ H2AX-positive cells were not strongly TUNEL-positive, indicating that  $\gamma$ H2AX accumulated prior to replication catastrophe. **F.** Cell-cycle profiles of U2OS cells treated with DMSO or ATRi. **G.** Quantification of chromatin-bound RPA in 2,000 U2OS cells treated with DMSO or ATRi. Medium RPA intensities of RPA-positive cells in various cell populations were determined. Error bars: I.Q.R., n=922 to 1095 in various cell populations. **H.** U2OS cells were treated with ATRi for 8h, and analyzed by  $\gamma$ H2AX and pRPA32 immunostaining.

**Fig. S2, related to Fig. 2. A cell-cycle time course of synchronized cells.** T98G cells were synchronized by serum starvation, released into serum containing media, and analyzed at the indicated times. Levels of the indicated cell-cycle markers were analyzed by Western.

**Fig. S3, related to Fig. 3. Suppression of ATRi-induced DNA damage.** **A.** RPE1 cells were treated with DMSO or the indicated inhibitors and analyzed using DNA fiber assay. Fractions of replication tracts with fired origins were determined. Error bars: S.D. (n=3). **B.** U2OS cells were treated with DMSO or ATRi. Levels of RRM2, E2F1, and  $\gamma$ H2AX were analyzed by Western. **C.** U2OS cells transfected with Cyclin F or control siRNA were treated with DMSO or ATRi. Levels of Cyclin F and RRM2 were analyzed by Western. **D.** U2OS cells were treated with DMSO or ATRi for 8 h. Relative levels of RRM2 mRNA were determined by RT-qPCR. **E.** U2OS cells were treated with DMSO, roscovitine, or CDK2i in the presence or absence of ATRi. Levels of pRPA32 and  $\gamma$ H2AX were analyzed by Western. **F.** U2OS cells infected with HA-RRM2-expressing retrovirus or control virus were treated with Chk1i for 8 h. Levels of RRM2 and  $\gamma$ H2AX were analyzed at the indicated times. **G.** U2OS cells transfected with CDC7 or control siRNA were treated with DMSO or ATRi for 8 h. Levels of pRPA32,  $\gamma$ H2AX and CDC7 were analyzed by Western.

**Fig. S4, related to Fig. 4. The distinct effects of ATRi and Chk1i on cycling cells.** **A.** U2OS cells were treated with CPT for 1 h in the presence or absence of ATRi. The phosphorylation of Chk1 at S317 was used as readout of ATR inhibition. In the left panel, CPT and ATRi were added at the same time. In the right panel, CPT was added 7 h after ATRi. **B.** U2OS cells were treated with CPT in the presence of increasing concentrations of ATRi (VE-821) or Chk1i (MK-1775). The phosphorylation of Chk1 at S296 was used as an indicator of Chk1 activity. **C.** U2OS cells were treated with DMSO, 10  $\mu$ M ATRi, or increasing concentrations of Chk1i. The stabilization of CDC25A was analyzed as an indicator of Chk1 inhibition. **D.** U2OS cells were treated with HU in the presence of DMSO, ATRi (10  $\mu$ M VE-821), ATRi#2 (1  $\mu$ M AZ20), ATRi#3 (10  $\mu$ M EPT-46464), Chk1i (2  $\mu$ M MK-8776), or Chk1i#2 (0.3  $\mu$ M UCN-01). **E.** U2OS

cells were treated with DMSO and the indicated inhibitors for 8 h. Levels of pDNA-PK, pRPA32, and  $\gamma$ H2AX were analyzed by Western. **F.** U2OS cells were transfected with control siRNA, two independent ATR siRNAs, or two independent Chk1 siRNAs. Levels of the indicated proteins were analyzed by Western. **G.** U2OS cells transfected with control, ATR, or Chk1 siRNA were analyzed by  $\gamma$ H2AX immunostaining. **H.** U2OS cells were treated with increasing concentrations of ATRi or Chk1i. Cell survival was analyzed after 5 days of treatment. **I.** U2OS cells were treated with DMSO, ATRi, or Chk1i for 2 h. Levels of ssDNA were analyzed by native BrdU staining. **J.** U2OS cells were treated with DMSO or Chk1i as indicated. BrdU and  $\gamma$ H2AX intensities were quantified in 1,200 cells at the indicated times. Data of the same DMSO and Chk1i 8h samples are also shown in Fig. 4C. **K-L.** U2OS cells were treated with 10  $\mu$ M ATRi or the indicated concentrations of Chk1i. Levels of CDC25A were analyzed at 2 and 8 h in (K). Levels of  $\gamma$ H2AX were analyzed at 2, 8, and 16 h in (L).

**Fig. S5, related to Fig. 5. A DNA-PK and Chk1-mediated backup pathway.** **A.** U2OS cells were treated with ATRi and DNA-PKi as indicated. Levels of pChk1 and pDNA-PK were analyzed by Western. The sample 6+2h was treated with ATRi twice at 0 and 6 h, and analyzed at 8 h. **B.** U2OS cells were treated with various inhibitors as indicated. Levels of pChk1 and CDC25A were analyzed by Western. ATRi#2: AZ20. **C-D.** U2OS cells were treated with ATRi, ATMi, and DNA-PKi as indicated. Levels of pATM, pDNA-PK, pRPA32,  $\gamma$ H2AX, and pChk2 were analyzed by Western. **E-F.** U2OS transfected with KU70 siRNAs (E) or SLX4 and MUS81 siRNAs (F) were treated with DMSO or ATRi for 8 h. Levels of pDNA-PK, pRPA32,  $\gamma$ H2AX, KU70 and MUS81 were analyzed by Western. **G-I,** U2OS cells were transfected with Claspin (G), RAD17 (H), TopBP1 (I) siRNAs or mock treated. Transfected cells were treated with ATRi, and levels of pChk1, Chk1, and other indicated proteins were analyzed at the indicated times. **J-**

**H.** U2OS cells were treated with DMSO, Chk1i, and roscovitine as indicated in J, or treated with DMSO, ATRi, and Wee1i as indicated in H. BrdU intensities of 1,000 cells were quantified. Yellow lines indicate mean BrdU intensities in various cell populations. Fractions of cells displaying high levels of ssDNA were quantified and shown on the top. \*\*\*\*,  $P < 0.0001$ .

**Fig. S6, related to Fig. 6. ATRi but not Chk1i selectively kill cancer cells under high replication stress. A-B.** U2OS cells were treated with DMSO, ATRi, or Chk1i in the absence or presence of HU. BrdU intensities of 1,000 cells were quantified at 2 h (A) or 16 h (B). \*\*\*\*,  $P < 0.0001$ ; n.s., not significant. **C.** U2OS cells were induced to overexpress Cyclin E or left uninduced, and treated with ATRi for the indicated time. BrdU intensities of 2,000 cells were quantified. **D.** U2OS cells were transfected with control or two independent RB siRNAs, and treated with DMSO, ATRi or Chk1i for 16 or 40 h. RB knockdown was confirmed by Western. Fractions of  $\gamma$ H2AX-positive cells were quantified. Error bars: S.D. (n=3). **E.** T98G, RPE1, and MCF10A cells were treated with DMSO or ATRi for 8 h. Levels of ssDNA were analyzed by native BrdU staining in PCNA-positive cells. **F.** U2OS, RPE1, and MCF10A cells were treated with DMSO or ATRi for 8 h. Levels of ssDNA were analyzed by native BrdU staining. Fractions of cells displaying high levels of ssDNA were quantified and shown on the top. **G.** U2OS, RPE1, and MCF10A cells were treated with ATRi for 0, 8, and 16 h. Fractions of TUNEL-positive cells were quantified. Error bars: S.D. (n=3). **H-I.** Four colorectal cancer cell lines were treated with DMSO or ATRi for 2 h (H) or 16 h (I). Levels of ssDNA and  $\gamma$ H2AX were analyzed by native BrdU staining (H) and  $\gamma$ H2AX immunostaining (I), respectively. Fractions of ATRi-treated cells displaying higher levels of ssDNA or  $\gamma$ H2AX than control cells were labeled in red and quantified (see Supplemental Methods). **J-K.** Ten colorectal cancer cell lines were treated with increasing concentrations of ATRi in the absence or presence of HU. Cell survival was analyzed

6 days after the treatment (J). The S.D. of each cell survival data was determined from experimental triplicates (n=3) (K). **L.** The 10 colorectal cancer cell lines were cultured in BrdU-containing media for 36 h. The BrdU labeling of DNA was confirmed by denatured BrdU staining. Fractions of S-phase cells were determined by PCNA staining. **M.** The common mutations of colorectal cancer do not correlate with ATRi sensitivity. **N.** The microsatellite stability/instability (MSS/MSI), CpG island methylation phenotype (CIMP), and chromosomal instability (CIN) of colorectal cancer cell lines do not correlate with ATRi sensitivity [adapted from the reference (Ahmed et al., 2013)].

## **Supplemental Methods**

### **Antibodies**

The antibodies used in this study include:  $\gamma$ H2AX monoclonal antibody (Cell Signaling or EMD Millipore), RPA32 monoclonal antibody (Thermos), CDC7 monoclonal antibody (Abcam), CDC25A monoclonal antibody (Santa Cruz), DNA-PKcs monoclonal antibody (Cell Signaling), MUS81 monoclonal antibody (Abcam), KU70 monoclonal antibody (GeneTex), Chk1 monoclonal antibody (Santa Cruz), Chk2 monoclonal antibody (Upstate), BrdU monoclonal antibody (BD Biosciences), H3 polyclonal antibody (Abcam), PCNA polyclonal antibody (Abcam), RPA32 pS4/8 polyclonal antibody (Bethyl), Tubulin polyclonal antibody (Cell Signaling), DNA-PKcs pS2056 polyclonal antibody (Abcam), ATM polyclonal antibody (Bethyl), ATM pS1981 polyclonal antibody (Abcam), Chk2 pT68 polyclonal antibody (Cell Signaling), Chk1 pS296 polyclonal antibody (Cell Signaling), Chk1 pS317 polyclonal antibody (Cell Signaling), RB monoclonal antibody (Cell Signaling), Cyclin E monoclonal antibody (Santa Cruz), Cyclin A polyclonal antibody (Santa Cruz), CDT1 polyclonal I antibody (Santa Cruz), H3 pS10 polyclonal antibody (EMD Millipore), GAPDH polyclonal antibody (EMD Millipore),

RRM2 monoclonal antibody (Abnova), ATR polyclonal antibody (Bethyl), E2F1 polyclonal antibody (Santa Cruz), Cyclin F polyclonal antibody (Santa Cruz), RAD17 polyclonal antibody (Abcam), Claspin polyclonal antibody (Bethyl), TopBP1 polyclonal antibody (Bethyl), and HA monoclonal antibody (Covance).

### **RNA interference**

siRNA transfections were done by reverse transfection with Lipofectamine RNAiMax (Invitrogen). siATR#1-2, siChk1#1-2, siRPA70, siMUS81#1-2, siSLX4#1-2, siKU70#2, siClaspin, siTopBP1, siRAD17, and siCyclin F (Dharmacon or Invitrogen) were transfected at 20 nM. siDNA-PK, siRB#1-2 and siKU70#1 (Silencer® Select siRNAs from Ambion) were transfected at 5 nM. Cells were treated with various drugs 48 h after transfection. The sequences of the siRNAs used in this study are:

siATR#1: CCUCCGUGAUGUUGCUUGA  
siATR#2: CCCGCGUUGGCGUGGUUGA  
siChk1#1: GCAACAGUUAUUUCGGUAUA  
siChk1#2: GCGUGCCGUAGACUGUCCA  
siKU70#1: GACAUAUCCUUGUUCUACA  
siKU70#2: GGCCUUGGAUUUGAUGGAGCCGGAA  
siMUS81#1: CGCGCUUCGUUUUCAGAA  
siMUS81#2: CAGCCCUGGUGGAUCGAUA  
siSLX4#1: GCUACCCGGACACUUGUCAUUGUUA  
siSLX4#2: UCUGCUUUCUAGGGUGGCAUUUGGA  
siDNA-PKcs: GCGUUGGAGUGCUACAACA  
siRB#1: GAACAGGAGUGCACGGUAU  
siRB#2: CAACCCAGCAGUUCGAUUAU  
siCDC7: GCAGUCAAAAGACUGUGGAU  
siClaspin: GGAAAGAAAGGCAGCCAGA  
siTopBP1: GUGGUUGUAAACAGCGCAUCUU  
siRAD17: AACAGACUGGGUUGACCCAUC  
siCyclin F: GGAUAAACCUAUGCAUACA

### **Use of inhibitors and chemicals**

The kinase inhibitors used in this study are listed in the Method section. When various inhibitors were used in combination with ATRi or in comparison with ATRi, they were added to cell



cultures at the same time as ATRi unless indicated otherwise. Other chemicals used in this study include: Camptothecin (1  $\mu$ M), BrdU (10  $\mu$ M), 5-chlorodeoxyuridine (CldU), 5-iododeoxyuridine (IdU), tetracycline (4  $\mu$ g/ml), MG132 (10  $\mu$ M), Cycloheximide (50  $\mu$ g/ml), and hydroxyurea (as indicated).

### **Cells synchronization**

T98G were cultured in DMEM supplemented with 0.02 % FBS and 1 % penicillin/streptomycin for 48 h. Subsequently, cells were released into fresh DMEM media containing 10 % FBS and analyzed at the indicated times.

### **Immunofluorescence**

To visualize ssDNA, cells were cultured in 10  $\mu$ M BrdU for 36 h before the treatments with various inhibitors. To measure DNA synthesis, cells were pulse-labeled with 10  $\mu$ M EdU for 15 min and processed with the Click-iT EdU Alexa Fluor 488 Imaging Kit according to manufacturer's instructions (Life Technologies). For immunostaining, cells were incubated in pre-extraction buffer (10 mM PIPES pH 6.8, 100 mM NaCl<sub>2</sub>, 300 mM sucrose, 3 mM MgCl<sub>2</sub>, 1 mM EGTA and 0.2% Triton X-100) for 5 min, fixed with 3% paraformaldehyde in 1xPBS for 20 min, washed with 1xPBS, and fixed with cold methanol (-20°C) for 20 min. Subsequently, cells were washed with 1xPBS, treated with cold acetone (4°C) for 30 sec, washed a second time with 1xPBS, and blocked in PBS-T (1xPBS containing 0.05 % Tween-20) containing 2% BSA for 1 h. Cells were then incubated with the primary antibody diluted in 1xPBS containing 2% BSA at room temperature for 2 h. Coverslips were washed three times with PBS-T before the 1-hr incubation with the appropriate secondary antibodies conjugated to fluorophores (Cy3 or Alexa-488). After three washes with 1xPBS, cells were stained with DAPI. The images were captured using a Nikon 90i microscope.

### **Quantitative fluorescence analysis of individual cells**

Images of 1,000 to 5,000 randomly selected cells were acquired using a Nikon Eclipse 90i microscope with a Nikon Plan Apo Lambda 10X objective. Signals of BrdU, EdU, RPA32,  $\gamma$ H2AX, and DAPI of individual cells were quantified using the Fiji software. The staining signals of each nucleus were measured in DAPI-stained area. To measure DNA content, the mean intensity of DAPI staining of each cell was multiplied to the size of DAPI-stained area.

To quantify the induction of ssDNA and  $\gamma$ H2AX by ATRi in various colorectal cancer cell lines, we manually set a threshold for each cell line above the majority (98-98.5%) of DMSO-treated control cells. The ATRi-treated cells that displayed ssDNA or  $\gamma$ H2AX above these thresholds were scored as positive.

### **Chromatin fractionation**

Fractionation of cell extracts was performed essentially as described by Mendez and Stillman (Mendez and Stillman, 2000). A total of  $\sim 3 \times 10^6$  U2OS cells were washed with 1xPBS and resuspended in 200  $\mu$ l of solution A (10 mM HEPES at pH 7.9, 10 mM KCl, 1.5 mM MgCl<sub>2</sub>, 0.34 M sucrose, 10% glycerol, 1 mM DTT, 10 mM NaF, 1 mM Na<sub>2</sub>VO<sub>3</sub> and protease inhibitors). Triton X-100 was added to a final concentration of 0.1%, and the cells were left on ice for 5 min. Cytoplasmic proteins (S1) were separated from nuclei by low-speed centrifugation (1400xg for 4 min). Isolated nuclei were washed three times with solution A and lysed in 200  $\mu$ l of solution B (3 mM EDTA, 0.2 mM EGTA, 1 mM DTT and protease inhibitors). After a 30 min incubation at 4°C, soluble nuclear proteins (S2) were separated from chromatin by centrifugation (1700xg for 4 min) and combined with S1 (soluble fraction). Isolated chromatin was washed three times with solution B and collected by centrifugation (1700xg for 4 min). Finally, chromatin was

resuspended in 200  $\mu$ l of Laemmli buffer and sheared by sonication. The soluble and chromatin fractions were analyzed by Western using various antibodies.

### **DNA fiber assay**

Cells were labeled with CldU (100  $\mu$ M) for 30 min and then with IdU (250  $\mu$ M) for 30 min in the presence or absence of various inhibitors. DNA fibers were spread as described (Jackson and Pombo, 1998). Briefly, cells suspended in 1xPBS (2.5  $\mu$ l of suspension at  $\sim 10^6$  cell/ml) were spotted on to a glass slide and allowed to dry. Cells were subsequently treated with 7.5  $\mu$ l of spreading buffer (0.5% SDS, 200 mM Tris-HCl pH7.4, 50 mM EDTA) for 3-5 min. Slides were tilted ( $\sim 15^\circ$ ) to allow cell lysates to slowly run down the slide. The DNA on slides was air dried, fixed in methanol-acetic acid (3:1) for 2 min, and dried overnight at room temperature. Fixed DNA was denatured with 2.5 N HCl for 30 min at room temperature. Then DNA was washed 3 times for 5 min with PBS-T (PBS + 0.05% Tween-20) and blocked in PBS-T containing 2% BSA for 30 min at 37°C. DNA fibers were incubated with rat anti-BrdU (OBT0030, AbDSerotec) (1:200) and mouse anti-BrdU (BD Biosciences) (1:20) antibodies for 1 h at 37°C, followed by the incubation with Alexa-488-conjugated anti-mouse (1:100) and Cy3-conjugated anti-rat (Jackson ImmunoResearch) (1:100) secondary antibodies for 30 min 37°C. Slides were washed 3 times with PBS-T containing 1% BSA and mounted using VectaShield (Vector Labs). DNA fibers were imaged at 60X with a Nikon 90i microscope.

### **TUNEL assay**

Cells were incubated in pre-extraction buffer (10 mM PIPES pH 6.8, 100 mM NaCl<sub>2</sub>, 300 mM sucrose, 3 mM MgCl<sub>2</sub>, 1 mM EGTA and 0.2% Triton X-100) for 5 min. The TUNEL-positive cells were detected by using the ApopTag® Fluorescein Direct *In situ* Apoptosis Detection Kit as described by the supplier (EMD Millipore).

### **Cell viability assay**

Cells were seeded in 96-well plates at a density of 500 cells per well. On the following day, cells were treated with the indicated concentration of ATRi in the presence or absence of HU (0.05 mM). Cell viability was measured 6 days after the treatment using CellTiter-Glo Luminescent reagent (Promega).

### **Flow cytometry analysis**

To analyze the cell-cycle distribution of cells, cells were pulse-labeled with 10  $\mu$ M EdU for 30 min and then processed using the Click-iT EdU Alexa Fluor 647 Flow Cytometry Assay Kit according to manufacturer's instructions (Life Technologies). An additional incubation with  $\gamma$ H2AX-FITC antibody (EMD Millipore) was performed according to manufacturer's instructions when indicated. Data acquisition was performed on a FACS LSRII apparatus equipped with the FACS Diva software (BD Biosciences). Further analysis was carried out using the Kaluza software (Beckman Coulter).

### **Quantitative RT-PCR**

Total RNA was extracted from U2OS cells using RNeasy Mini kit (Qiagen) according to the manufacturer's instruction. Following extraction, total RNA was reverse transcribed using the High Capacity cDNA Reverse Transcription Kit (Life Technologies). RT products were analyzed by real time qPCR using SYBR Green in an ABI PRISM 7500 sequence detection system (Applied Bio-system). For each sample tested, the levels of *RRM2* mRNA were normalized to the levels of *GAPDH* mRNA. When relative levels of *RRM2* mRNA were compared between DMSO and ATRi treated cells, the levels in DMSO treated cells were defined as 1. The sequences of the PCR primers are: *GAPDH*-forward, AGGTCGGTGTGAACGGATTTG ; *GAPDH*-reverse,

TGTAGACCATGTAGTTGAGGTCA; *RRM2*-forward, TTCTTTGCAGCA-AGCGATGG ;  
*RRM2*-reverse, TTGGCTAAATCGCTCCACCA.

**Supplemental reference:**

Ahmed, D., Eide, P.W., Eilertsen, I.A., Danielsen, S.A., Eknaes, M., Hektoen, M., Lind, G.E., and Lothe, R.A. (2013). Epigenetic and genetic features of 24 colon cancer cell lines. *Oncogenesis* 2, e71.

Jackson, D.A., and Pombo, A. (1998). Replicon clusters are stable units of chromosome structure: evidence that nuclear organization contributes to the efficient activation and propagation of S phase in human cells. *J Cell Biol* 140, 1285-1295.

Mendez, J., and Stillman, B. (2000). Chromatin association of human origin recognition complex, *cdc6*, and minichromosome maintenance proteins during the cell cycle: assembly of prereplication complexes in late mitosis. *Mol Cell Biol* 20, 8602-8612.
